# Supplementary material
Source: PubMed Central journal article supplement (PMC4660266)
Supplement: NIHMS729592-supplement-1.pdf [file NIHMS729592-supplement-1.pdf]

## SUPPLEMENTAL EXPERIMENTAL PROCEDURES

### Generation of ATM-proficient and -deficient *c-Myc-DJ $\beta$* *v-Abl* pro-B Cell Lines

Cells from bone marrow of 3-weeks old *ATM*<sup>-/-</sup>-*c-Myc*<sup>DJ $\beta$ /DJ $\beta$</sup> -*E $\mu$ -Bcl-2* or *ATM*<sup>+/-</sup>-*c-Myc*<sup>DJ $\beta$ /DJ $\beta$</sup> -*E $\mu$ -Bcl-2* mice were transfected by pMSCV-*v-Abl* retrovirus as described previously (Bredemeyer et al., 2006). Transfected cells were cultured in RPMI medium with 15% (v/v) FBS for 2 months to form stable transformed *v-Abl* pro-B cell lines. ATM inhibitor Ku55933 was used at 10  $\mu$ M to treat the WT DEL-SJ-containing cells.

### Preparing HTGTS Libraries

Locus-specific primers for HTGTS were listed in Table S5. For preparing HTGTS libraries with DFL16.1 5' 12RSS bait at *IgH* locus, we used the same protocol described previously (Frock et al., 2015). For HTGTS libraries from *c-Myc-DJ $\beta$*  cassette- or DEL-SJ-containing cells, we made some modifications to the original protocol as below, which showed the same pattern but with a higher efficiency. In the linear amplification-mediated PCR step, we used Phusion polymerase (Thermo) instead of Taq polymerase (Roche) to perform an 85-cycle PCR with 75- $\mu$ M dNTPs. In the adapter ligation step, we used a new adapter (comprised of “GCGACTATAGGGCACGCGTGGNNNNNN-NH<sub>2</sub>” and “/5'Phosphorylation/-CCACGCGTGCCCTATAGTCGC-NH<sub>2</sub>”) at the concentration of 2.5  $\mu$ M instead. Restriction enzyme was used to suppress *bona fide* V(D)J recombination products within the paired *bona fide* RSSs-containing cassettes: *Pst*I for *c-Myc* E1 primer in *c-Myc-DJ $\beta$*  cassette, *Sca*I for 12S primer in DEL-SJ, and *Mlu*I for 23S primer in DEL-SJ. No restriction enzyme blocking was performed for *IgH* and DEL-SJ GFP-primer HTGTS libraries. All the HTGTS libraries were sequenced by Miseq with paired ends each at a read length of 250 bp.

### HTGTS Data Analyzing and Normalization

The pipeline used for running HTGTS was the same as described previously (Frock et al., 2015). Miseq sequencing reads were aligned to *mm9* genome, with modified genomes in some

cases depicted in details below. We further filtered the junctions by removing those with more than 30-bp un-aligned sequences between bait and prey sequences.

For HTGTS libraries from *c-Myc*-DJ $\beta$  cassette- or DEL-SJ-containing cells, the sequencing reads were separately aligned to *mm9* genome or paired *bona fide* RSSs-containing cassettes. The former detects genome-wide translocations and the latter detects *bona fide* RSS-mediated rearrangements in the cassettes. Junctions in the paired *bona fide* RSSs-containing loop domains were displayed by IGV (Robinson et al., 2011) without adding the *bona fide* rearrangements. The junction diversity between RAG-initiated DSBs is very limited (Gellert, 2002), thus we took the duplicate junctions into account to reflect more accurate frequencies of translocations between bait *bona fide* RSSs and other RSSs. When junctions have the same bait length and prey length with the same length of inserted sequences if any, we defined them as duplicate junctions. The BM pro-B cells can proliferate to duplicate early translocation junctions, thus no duplicate junctions were contained for analysis in HTGTS libraries from these cells. For HTGTS libraries from the G1-arrested *v-Abl* pro-B cells, duplicate junctions with different prey length result from random sonication shearing on independent translocation junction-containing fragments. Therefore, these duplicate junctions were considered as independent biological events and were contained for analysis. For libraries from 12S or 23S primers in DEL-SJ-integrated cells, we prepared one library from pooled genomic DNA of 6 strains with independent integration locations for ATM-proficient and deficient *v-Abl* cells, respectively. All 12 DEL-SJ-containing loop domains showed very similar general patterns (see the text for details) providing robust controls for reproducibility of the main conclusions. For libraries with DFL16.1 5' 12RSS bait at *IgH* locus, to accurately map the junctions, Miseq reads were aligned to modified *mm9* genome (*mm9\_8653*), in which the *IgH* sequence between DFL16.1 and J<sub>H3</sub> (*mm9* coordinates: chr12: 114667296 -114720403) was replaced by the DFL16.1-J<sub>H3</sub> join sequence (CTGCAGAGACAGTGACCAGAGTCCCTTGGCCCCAGTAAGCAAACCAGGGT AGCTACTACCGTAGTAATAAA) harbored in the ATM<sup>-/-</sup> *v-Abl* pro-B cells (8653). RAG on-target analysis included junctions within  $\pm 20$  bp of the cleavage site of *IgH* *bona fide* RSSs and associated resection. Annotation of V<sub>H</sub> RSSs was from Choi et al., 2013. Annotation of D<sub>H</sub> and

J<sub>H</sub> RSSs was obtained from IMGT/GENE-DB (Giudicelli et al., 2005). *IgH* junctions excluding on-targets were used for RAG off-target analysis. All duplicates were included for *IgH* junction analysis as on-target V(D)J recombination generates a vast majority of RSS joins that are perfectly fused and coding joins with very limited diversity as outlined above, thus, most independent V(D)J joins represented as duplicates in sequencing reads. We compared *IgH* off-target junctions containing all the duplicates with those containing only duplicates of diverse prey lengths and observed similar pattern between the two. To compare HTGTS libraries of ATM-deficient cells with and without IGCR1, the same amount (50 ug) of DNA were used for library preparation and junctions were further normalized to number of bait aligned reads that reflect the same amount of sequenced bait-containing alleles (Table S4). We also performed HTGTS from cycling cells before G1 arrest, which yielded less than 5% of junctions of G1-arrested cells, confirming that most of the junctions recovered from G1-arrested cells occurred *de novo* after G1 arrest. Note that the ChIP-seq data displayed for *IgH* locus was lifted-over to the *mm9\_8653* genome from the source (GSE40173).

### **Evaluation of On-target V(D)J Recombination Events in *c-Myc-DJβ* Cells**

To estimate the frequency of on-target (within *c-Myc-DJβ* cassette) and off-target events in *c-Myc-DJβ* cells, we prepared a HTGTS library for each genotype of *c-Myc-DJβ v-Abl* and BM cells without suppression of on-target V(D)J recombination events. We found the on-target events within *c-Myc-DJβ* cassette in ATM-proficient and -deficient BM *c-Myc-DJβ* cells represent about 98% of all events in each genotype. The *c-Myc-DJβ v-Abl* cells contain a rearranged DJβ allele in both genotypes; therefore we excluded translocation reads with the same junctional nucleotides as the pre-arranged DJβ for analysis and calculated the percentages of on-targets as approximately 97 % for both *v-Abl* genotypes.

### **Identification of Genome-wide Cryptic RSSs**

To identify genome-wide cryptic RSSs, we prepared libraries from DEL-SJ integrated in both chromosomes 1 and X, and 3 independent repeats for each. Translocation hotspots were

identified by MACS2 (Zhang et al., 2008) with extsize at 20 bp and false discovery rate (FDR) cut-off at  $10^{-9}$ . Peak regions with HTGTS junctions occurring in at least three libraries were considered as recurrent hotspots. Hotspots within the antigen receptor loci and the two DEL-SJ-containing domains were excluded from analysis.

Consensus sequence logos for the heptamer of cryptic RSSs were generated by the weblogo online tool (<http://weblogo.berkeley.edu>). Although sequence logos were not generated for associated nonamers, additional 32-bp sequences associated with cryptic RSS heptamer containing potential nonamers were listed in Table S3.

### **Generation of Cas9/gRNA DSBs for HTGTS Libraries and Gene Deletions**

ATM-deficient-DJ $\beta$ , ATM-deficient, or ATM-deficient-DJ $\beta$ -*Rag2*<sup>-/-</sup> *v-Abl* pro-B cells were treated with 3  $\mu$ M STI-571 at a concentration of  $5 \times 10^5$  cells/ml for 30 hours followed by nucleofection of pX330-Cas9-cmyc plasmid (15 $\mu$ g) into  $20 \times 10^6$  G1-arrested cells (2 reactions;  $10 \times 10^6$  cells each reaction) using default program DN100 in SF solution (X unit of 4D-Nucleofector from Lonza). Transfected cells were cultured in RPMI medium with 15% (v/v) FBS plus 3  $\mu$ M STI-571 for 3 more days before harvested for genomic DNA. HTGTS libraries were prepared and processed as described above; *SphI* digestion was applied to suppress germline sequences during the preparation HTGTS libraries.

For the *Rag2* and IGCR1 deletion, a mixture of 2  $\mu$ g upstream pX330-Cas9 plasmid and 2  $\mu$ g downstream pX330-Cas9 plasmid was nucleofected into  $3 \times 10^6$  growing parental cells. Nucleofected cells were subjected to single-cell sub-cloning the next day. Sub-clones with correct genotypes were confirmed by both Sanger sequencing and Southern blot.

### **Mapping the Integration Sites of DEL-SJ**

In order to map the integration sites of DEL-SJ, we designed a Cas9/gRNA cut site as bait in human CD4 in DEL-SJ (Table S5). To introduce breaks, 2  $\mu$ g pX330-Cas9-hCD4 plasmid were transfected into  $3 \times 10^6$  DEL-SJ-containing *v-Abl* pro-B cells via nucleofection, and cells were harvested for DNA 3 days later. We generated HTGTS libraries and identified the DEL-SJ

integration sites by checking hybrid sequences containing the tail sequence of MMLV LTR and a piece of genomic sequence. Then the integration sites and orientations were confirmed by locus-specific PCR with a primer in human CD4 in DEL-SJ and the other primers in the genome close to the integration sites (Table S5).

### **Orientation of CBEs**

To determine the orientation of CBEs, sequences of approximately 100 bp including core binding sites of CTCF were extracted from mouse *mm9* genome according to the ChIP-seq data (Lin et al., 2012). We then used ApE (<http://biologylabs.utah.edu/jorgensen/wayned/ape/>) to find the CBE motif with the least variations to the CBE consensus sequence 5'-CCACNAGGTGGCA G-3' (Rao et al., 2014). The CBE was defined as in “forward” orientation if the above consensus sequence reads from centromere to telomere, otherwise it’s defined as in “reverse” orientation.

### **Distance to *bona fide* RSSs and CAC Motif**

Loci information of CACs (and GTGs for reverse CACs) in the analyzed loop domains were derived from *mm9* genome by IGV (Robinson et al., 2011). Direct joining to CACs or the nucleotides adjacent to CACs was defined as 0.

**Supplemental Table 2. Summary of 12 Loop Domains Revealed by DEL-SJ HTGTS Libraries, Related to Figure 3.**

| Genotype           | Integrated chr | Integration site | Orientation* | Domain start | Domain end  | Domain size |
|--------------------|----------------|------------------|--------------|--------------|-------------|-------------|
| ATM <sup>-/-</sup> | Chr1           | 34546111         | -            | 34,275,801   | 34,904,745  | 629 kb      |
| ATM <sup>-/-</sup> | Chr4           | 94823238         | -            | 94,675,379   | 95,583,722  | 908 kb      |
| ATM <sup>-/-</sup> | Chr5           | 63245462         | -            | 61,747,765   | 64,203,530  | 2.46 Mb     |
| WT                 | Chr6           | 31169213         | -            | 30,999,620   | 31,576,644  | 577 kb      |
| ATM <sup>-/-</sup> | Chr8           | 97063319         | -            | 97,053,683   | 97,227,492  | 174 kb      |
| WT                 | Chr9           | 21133028         | -            | 20,932,840   | 21,214,281  | 281 kb      |
| ATM <sup>-/-</sup> | Chr10          | 79579094         | -            | 79,388,879   | 79,625,876  | 237 kb      |
| WT                 | Chr12          | 78159092         | +            | 77,908,979   | 80,012,123  | 2.10 Mb     |
| WT                 | Chr12          | 114465716        | +            | 114,461,087  | 114,667,734 | 207 kb      |
| WT                 | Chr17          | 46173771         | +            | 46,166,645   | 46,384,569  | 218 kb      |
| WT                 | Chr19          | 29560017         | -            | 28,851,550   | 29,895,679  | 1.04 Mb     |
| ATM <sup>-/-</sup> | ChrX           | 11242377         | +            | 10,295,345   | 12,372,065  | 2.08 Mb     |

a. \* “+” orientation is defined as 12RSS centromeric to 23RSS, or it’s in “-” orientation.

**Supplemental Table 4. Summary of HTGTS Libraries for *IgH* Locus, Related to Figure 6.**

| Genotype                       | Exp      | Input DNA | Junctions with duplication* | <i>IgH</i> on-targets | <i>IgH</i> off-targets |
|--------------------------------|----------|-----------|-----------------------------|-----------------------|------------------------|
| ATM <sup>-/-</sup>             | repeat 1 | 50 ug     | 7,403                       | 6,346                 | 794                    |
|                                | repeat 2 | 50 ug     | 8,403                       | 6,902                 | 756                    |
|                                | repeat 3 | 50 ug     | 11,245                      | 9,512                 | 1,068                  |
| ATM <sup>-/-</sup> -<br>IGCR1Δ | repeat 1 | 50 ug     | 269,316                     | 266,334               | 646                    |
|                                | repeat 2 | 50 ug     | 258,478                     | 255,781               | 492                    |
|                                | repeat 3 | 50 ug     | 230,884                     | 227,512               | 843                    |

a. \*Junctions are normalized to same amount of total bait aligned reads (606,723 reads per library). Bait aligned reads include all sequences containing bait primer, reflecting the same amount of bait alleles.

**Supplemental Table 5. Oligos Used, Related to Experimental Procedures.**

| <b>Name</b> | <b>Sequence</b>                | <b>Purpose</b>                                  |
|-------------|--------------------------------|-------------------------------------------------|
| Myc-E1-bio  | /5bio/TGATGTTGGGCTAGCGCAG      | HTGTS bio primers for DJ $\beta$ cassette       |
| Myc-E1-red  | AGGGATGTGACCGATTTCGTTG         | HTGTS nested primers for DJ $\beta$ cassette    |
| 12S-bio     | /5bio/GACCTTACACAGTCCTGCTG     | HTGTS bio primers for DEL-SJ 12RSS              |
| 12S-red     | GTAGACGGCATCGCAGCTTG           | HTGTS nested primers for DEL-SJ 12RSS           |
| 23S-bio     | /5bio/CAAAGACGGCAATATGGTGG     | HTGTS bio primers for DEL-SJ 23RSS              |
| 23S-red     | ACGCACACCGGCCTTATTCC           | HTGTS nested primers for DEL-SJ 23RSS           |
| GFP-bio     | /5bio/GACAACCACTACCTGAGCAC     | HTGTS bio primers for DEL-SJ GFP                |
| GFP-red     | CCAACGAGAAGCGCGATCAC           | HTGTS nested primers for DEL-SJ GFP             |
| Rag2-up     | GAATAGGTCTTTTATCTGAA           | Upstream Cas9 site for Rag2 deletion            |
| Rag2-down   | GAGCAATATACCTGAGTCTG           | Downstream Cas9 site for Rag2 deletion          |
| Myc-Cas9    | GACGAGCGTCACTGATAGTA           | For Cas9 site downstream of DJ $\beta$ cassette |
| Myc-bio     | /5bio/GCCTCGGCTCTTAGCAGACTG    | HTGTS bio primers for myc-Cas9                  |
| Myc-red     | CCTCTGAAGCCAAGGCCGATG          | HTGTS nested primers for myc-Cas9               |
| hCD4-Cas9   | GCAGTGTCTGCTGAGTGACT           | For Cas9 site at hCD4 in DEL-SJ                 |
| hCD4-bio    | /5bio/TGATGAGAGCCACTCAGCTC     | HTGTS bio primers for hCD4-Cas9                 |
| hCD4-red    | CCTAAGCTGATGCTGAGCTTG          | HTGTS nested primers for hCD4-Cas9              |
| IS-hCD4     | CAATGGCCCTGATTGTGCTG           | In the DEL-SJ for verifying integration site    |
| IS-Chr1     | CCTATTTTCTCCGACTAGCC           | For verifying DEL-SJ integration site           |
| IS-Chr4     | GAAGCACACATGTGGCTTGC           | For verifying DEL-SJ integration site           |
| IS-Chr5     | CTGGTGCTTACACCATAGAG           | For verifying DEL-SJ integration site           |
| IS-Chr6     | GTGAGGTATGAAGCCATGACC          | For verifying DEL-SJ integration site           |
| IS-Chr8     | TGTCGGGAGTTAGCTTCCAG           | For verifying DEL-SJ integration site           |
| IS-Chr9     | CTGTCCTCACACTCAGGTTTC          | For verifying DEL-SJ integration site           |
| IS-Chr10    | CAAGTGCGCAACATGACCTAGC         | For verifying DEL-SJ integration site           |
| IS-Chr12    | CTGCTACTATTGCTCCTCTG           | For verifying DEL-SJ integration site           |
| IS-Chr12    | CTAAGACAGTAAGGTAGACACAC        | For verifying DEL-SJ integration site           |
| IS-Chr17    | CTAGTTGGTTATGCGTATGAC          | For verifying DEL-SJ integration site           |
| IS-Chr19    | GAAGTAGAACAGAAGGGAAAG          | For verifying DEL-SJ integration site           |
| IS-ChrX     | CCGCACTCTTTGACACAGAC           | For verifying DEL-SJ integration site           |
| cRSS-bio    | /5bio/GTTCATATTCAAAGTTTAGTCGCC | HTGTS bio primers for cryptic RSS at Chr1       |
| cRSS-red    | CTCTAGCCAAAAGCTGGCTTC          | HTGTS nested primers for cryptic RSS at Chr1    |
| IGCR1_up    | GGAAAACCTCTGTAGGACTAC          | Upstream Cas9 site for IGCR1 deletion           |
| IGCR1_down  | TGGGACATGTAACTGTAAC            | Downstream Cas9 site for IGCR1 deletion         |
| DFL16.1-bio | /5bio/CTTGCTCCCTAGGACCTTCC     | HTGTS bio primer for DFL16.1 5' 12RSS           |
| DFL16.1-red | ACTGAAACTCAACCGTGCTG           | HTGTS nested primer for DFL16.1 5' 12RSS        |

a. DNA sequences of *c-Myc*-DJ $\beta$  cassette and DEL-SJ are available on request.

## SUPPLEMENTAL REFERENCES

Choi, N.M., Loguercio, S., Verma-Gaur, J., Degner, S.C., Torkamani, A., Su, A.I., Oltz, E.M., Artyomov, M., and Feeney, A.J. (2013). Deep sequencing of the murine IgH repertoire reveals complex regulation of nonrandom V gene rearrangement frequencies. *J. Immunol.* *191*, 2393–2402.

Gellert, M. (2002). V(D)J recombination: RAG proteins, repair factors, and regulation. *Annu. Rev. Biochem.* *71*, 101–132.

Giudicelli, V., Chaume, D., and Lefranc, M.-P. (2005). IMGT/GENE-DB: a comprehensive database for human and mouse immunoglobulin and T cell receptor genes. *Nucleic Acids Res.* *33*, D256–D261.

Robinson, J.T., Thorvaldsdóttir, H., Winckler, W., Guttman, M., Lander, E.S., Getz, G., and Mesirov, J.P. (2011). Integrative genomics viewer. *Nat. Biotechnol.* *29*, 24–26.
