# Supplementary material
Source: PubMed Central journal article supplement (PMC4660266)
Supplement: NIHMS729592-supplement-6.pdf [file NIHMS729592-supplement-6.pdf]

# Supplemental Figure 2

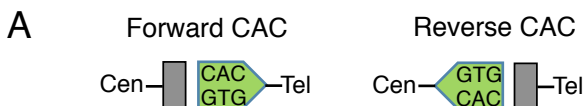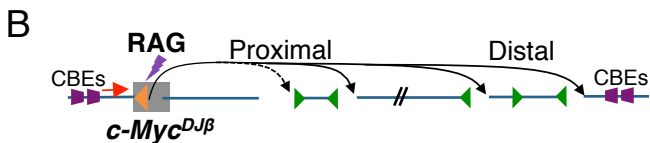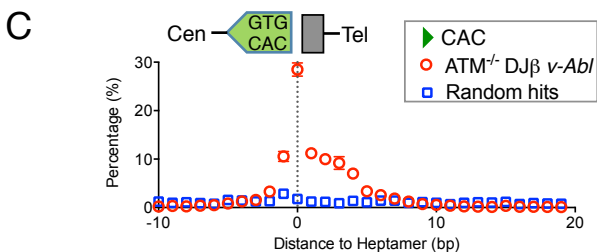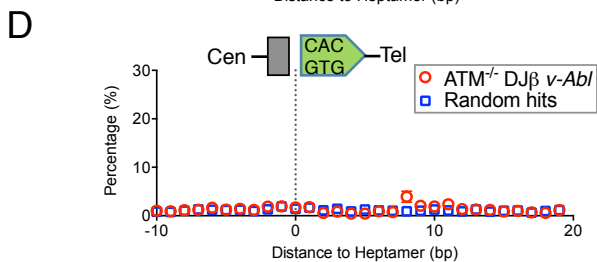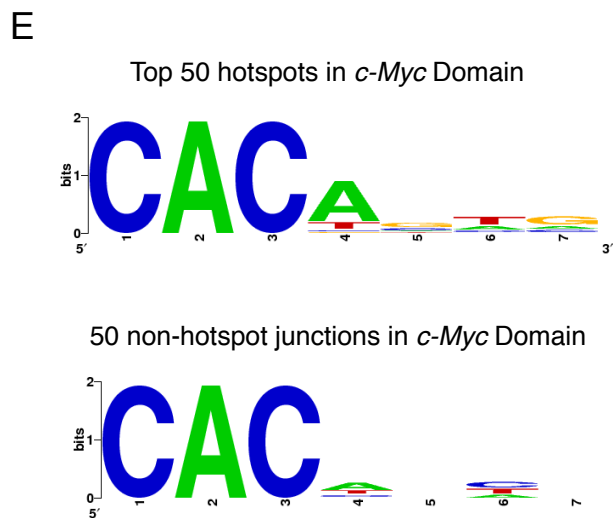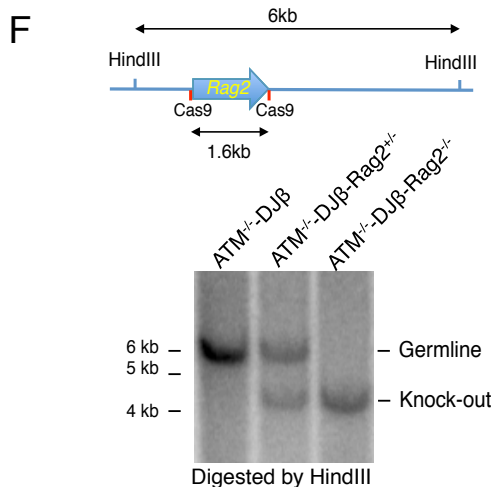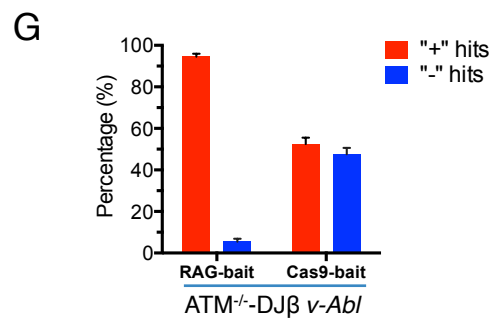

**H** Junctions in *c-Myc* Domain of *ATM*<sup>-/-</sup>-*DJβ*-*Rag2*<sup>-/-</sup> cells

|       | Junction | Strand | Distance to "CAC" (bp) |
|-------|----------|--------|------------------------|
| chr15 | 61822541 | +      | 9                      |
| chr15 | 62439824 | +      | 26                     |
| chr15 | 62566109 | -      | 51                     |
| chr15 | 63580495 | +      | 28                     |
| chr15 | 62418789 | +      | 6                      |
| chr15 | 62439143 | +      | 7                      |
| chr15 | 63294795 | +      | -4                     |
| chr15 | 63425165 | -      | 102                    |
| chr15 | 63508068 | +      | 3                      |
| chr15 | 61822283 | +      | 15                     |
| chr15 | 61828151 | +      | -174                   |
| chr15 | 61904302 | -      | 9                      |
| chr15 | 62211105 | -      | -64                    |
| chr15 | 62414748 | +      | 105                    |
| chr15 | 62575336 | +      | 64                     |
| chr15 | 62617704 | -      | -32                    |
| chr15 | 62617918 | +      | 21                     |
| chr15 | 62719727 | +      | 30                     |
| chr15 | 63343939 | +      | -18                    |
