# Supplementary material
Source: PubMed Central journal article supplement (PMC4660266)

Supplemental Figure 7

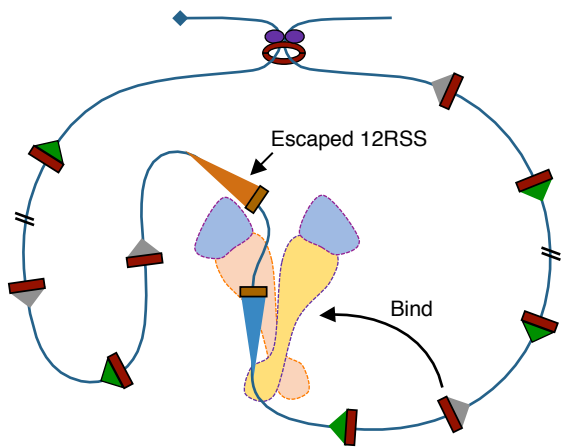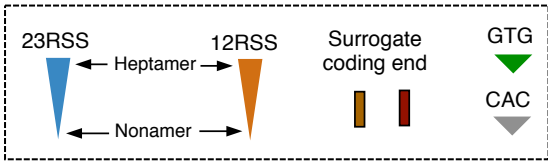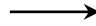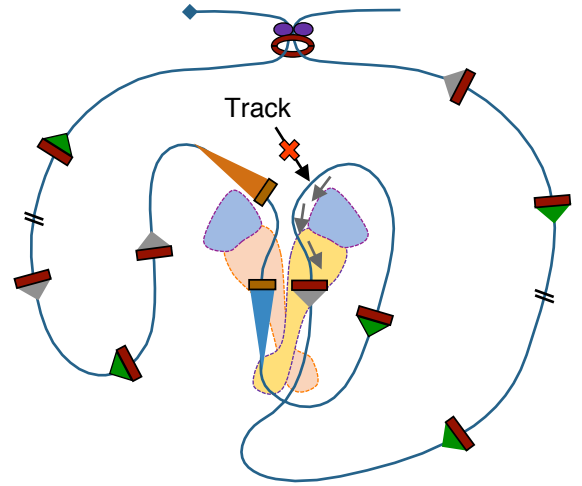

CACs in the other orientation limits the extent of RAG tracking

Supplement: NIHMS729592-supplement-11.pdf [file NIHMS729592-supplement-11.pdf]

# Supplemental Figure 1

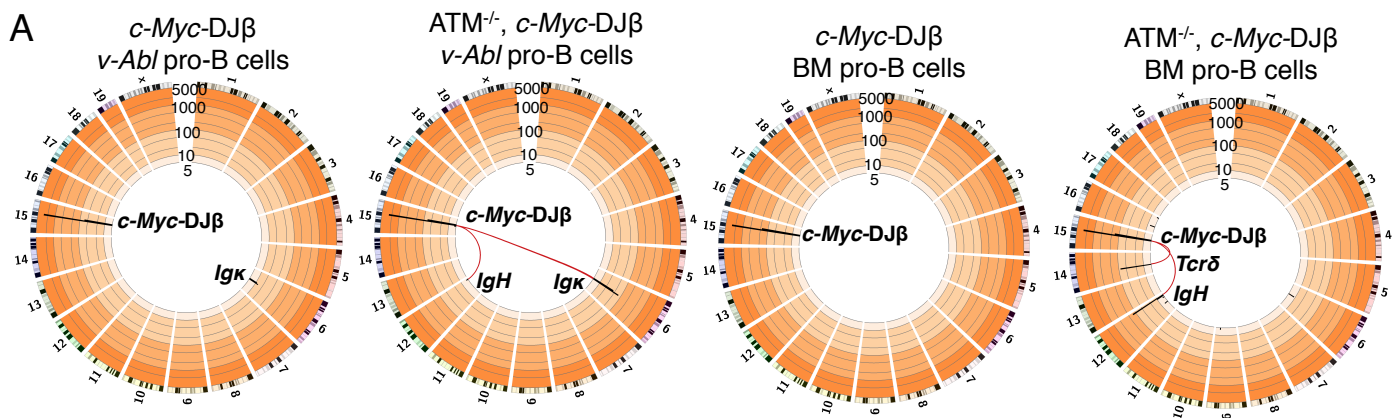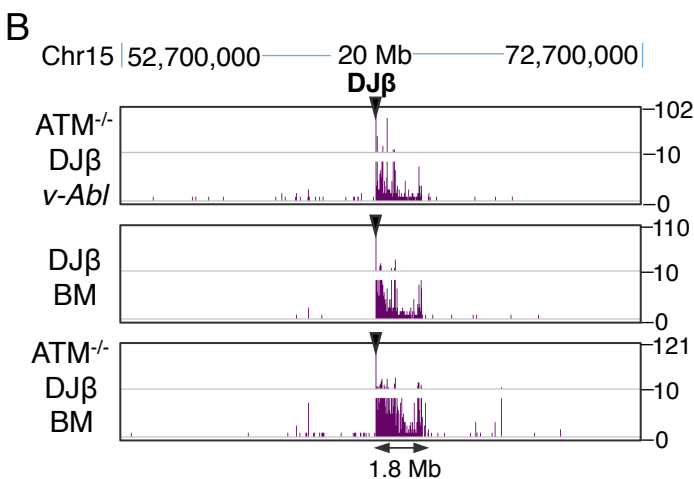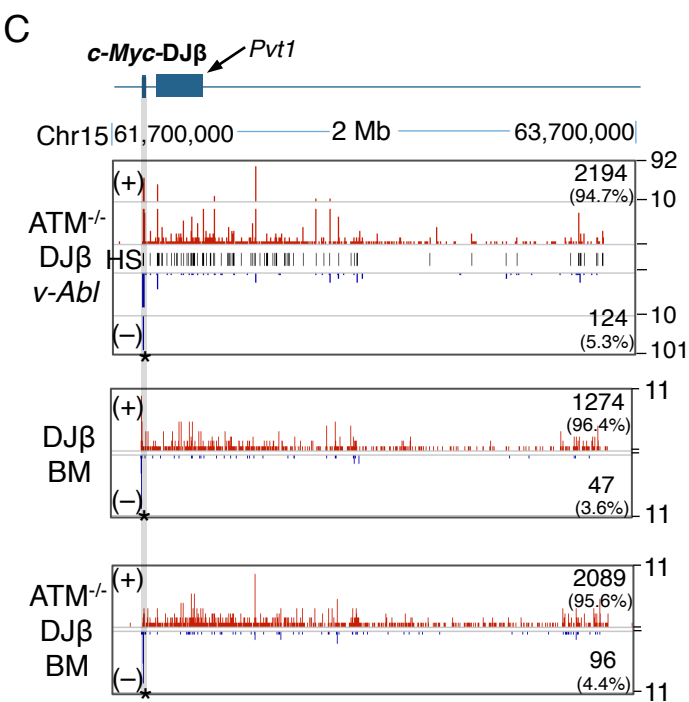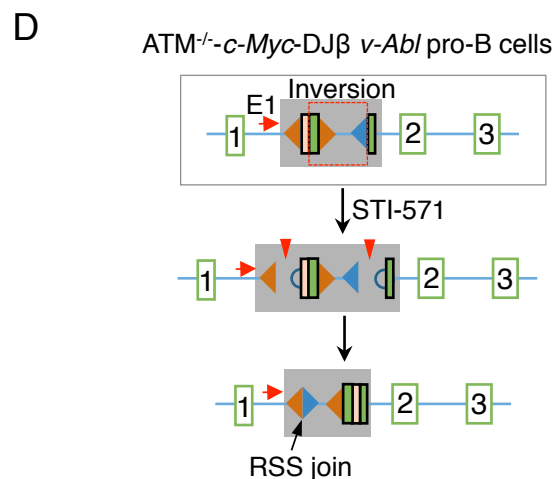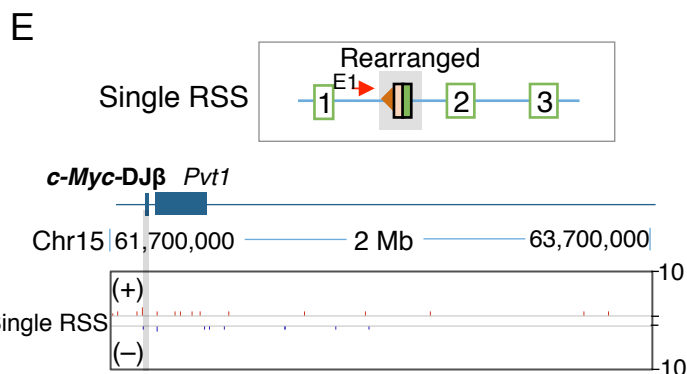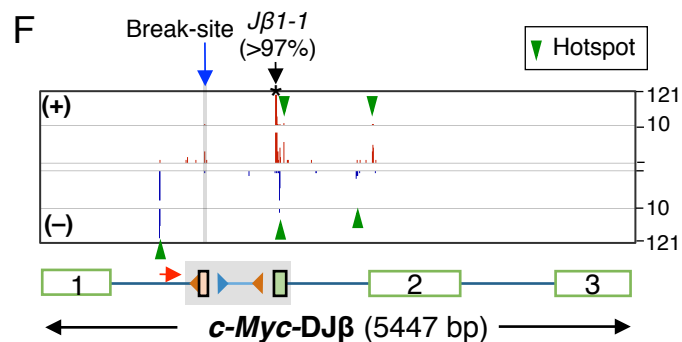

Supplement: NIHMS729592-supplement-5.pdf [file NIHMS729592-supplement-5.pdf]

# Supplemental Figure 3

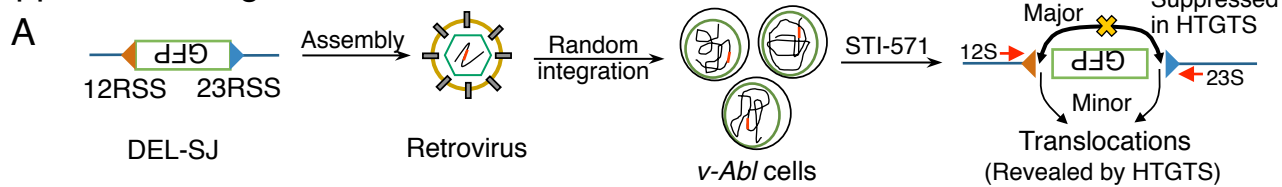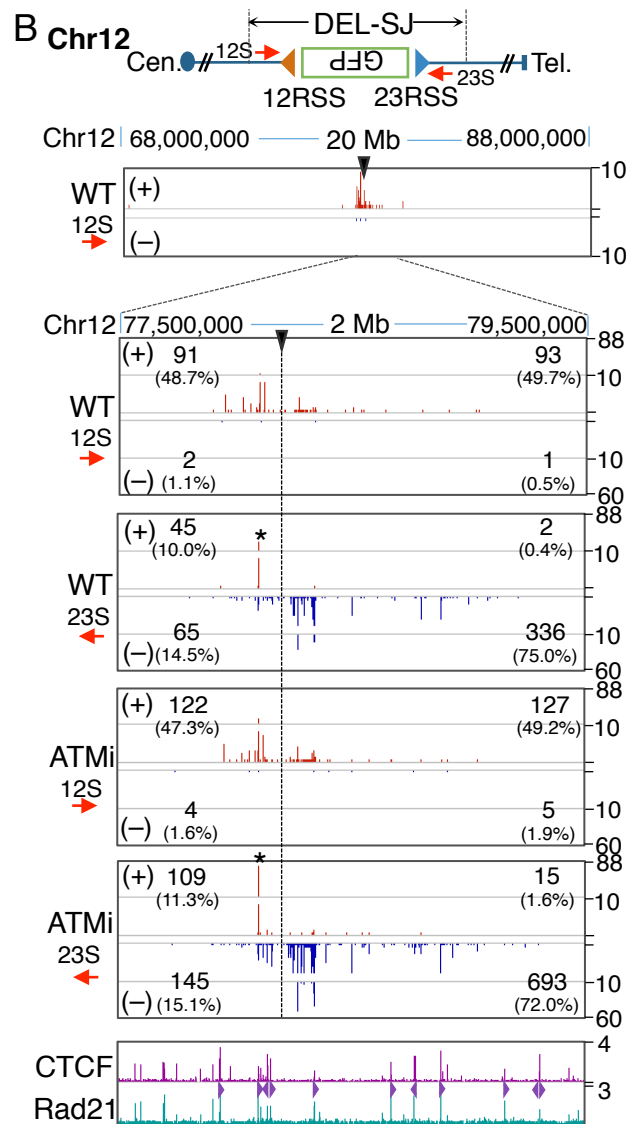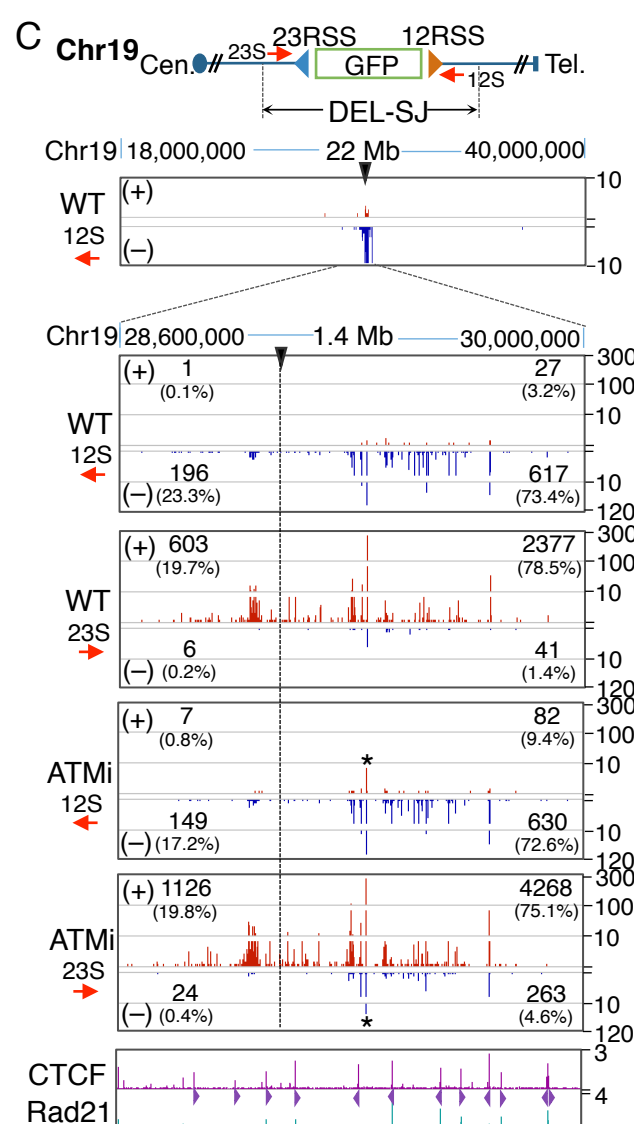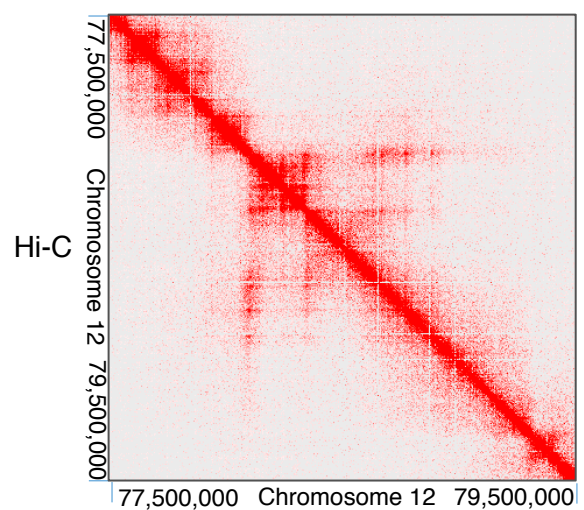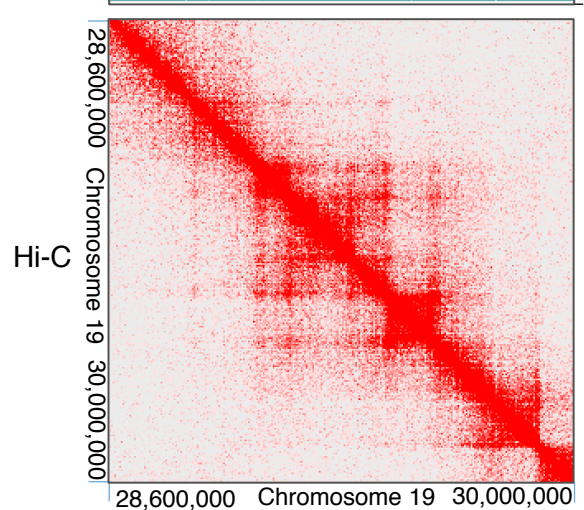

Supplement: NIHMS729592-supplement-7.pdf [file NIHMS729592-supplement-7.pdf]
